# Supplementary material
Source: PubMed Central journal article supplement (PMC6258313)
Supplement: NIHMS964264-supplement-supplement_1.pdf [file NIHMS964264-supplement-supplement_1.pdf]

## Supplementary Methods

Imaging acquired at the Canadian site was performed on a Siemens 1.5T Avanto (Siemens, Erlangen, Germany) MRI system. High-resolution SPGR 3D T1-weighted ( $1\text{ mm}^3$  isotropic voxels, acquisition matrix  $224 \times 256$ ), T2-weighted ( $0.43 \times 0.43 \times 3\text{ mm}$  voxels, acquisition matrix  $354 \times 512$ ) and FLAIR sequences ( $0.86 \times 0.86 \times 3\text{ mm}$  voxels, acquisition matrix  $256 \times 256$ ) were obtained in addition to DTI with 12 diffusion encoding gradients and an in-plane resolution of  $1.3\text{ mm}$  ( $2\text{ mm}$  thickness, acquisition matrix  $128 \times 128$ ). Imaging acquired at the U.S. site was performed on a 3.0 Tesla Siemens Magnetom Allegra syngo MR 2004A (Siemens, Erlangen, Germany) with DTI similar to the Canadian site, and high-resolution MP RAGE T1 weighted ( $1\text{ mm}^3$  isotropic voxels, acquisition matrix  $192 \times 256$ ), and T2 weighted ( $1\text{ mm}^3$  isotropic voxels, acquisition matrix  $256 \times 256$ ) images. High-resolution 3D full brain images were acquired to aid in normalization and co-registration.
